# Supplementary material for: Prescribing for Malignant Bowel Obstruction in Palliative Care: A Cross-Sectional Australia and New Zealand Survey of Palliative Medicine Practitioners
Source: Research Square preprint supplement (doi:10.21203/rs.3.rs-8363554/v1), 2026-01-23
Supplement: Supplementary file 1 [file 8b4acf7eff05e10e40745870.docx]

Prescribing for Malignant Bowel Obstruction in Palliative Care: A Cross-Sectional Australia and New Zealand Survey of Palliative Medicine Practitioners

Participant Questionnaire

When answering please consider your ***actual work practices*** in your ***primary place of practice***

1. How old are you?
   1. 20-30
   2. 31-40
   3. 41-50
   4. 51-60
   5. >60
2. How many years have you practiced in specialist palliative medicine as an advanced trainee or consultant?
   1. 0-5
   2. 6-10
   3. 11-15
   4. 16-20
   5. >20
3. Your primary place of practice in palliative medicine is:

(Please remember your selection as this will inform later questions)

- 1. Palliative care unit (public hospital)
  2. Palliative care unit (private hospital)
  3. Public hospital: inpatients
  4. Private hospital: inpatients
  5. Public hospital: outpatients
  6. Private hospital: outpatients

1. What is the setting of your primary place of practice:
   1. Metropolitan
   2. Regional
   3. Remote
2. What geographical location is your primary place of practice:
   1. New South Wales
   2. Queensland
   3. Western Australia
   4. South Australia
   5. Victoria
   6. Tasmania
   7. Northern Territory
   8. Australian Capital Territory
   9. New Zealand
   10. Other: Please Specify
3. Mr JS is a 68-year-old man with advanced colorectal cancer with peritoneal metastases. He is not a candidate for further surgical intervention. You meet with him in your current practice location and he describes a history of 3 days of severe continuous nausea with associated vomiting and is no longer passing stool or flatulence. While working in ***your primary place of practice*** in palliative medicine, you diagnose him with a malignant bowel obstruction.

Which of the following medication(s) would you prescribe first to best treat his nausea and vomiting? – Please select multiple options if applicable

1. Cyclizine
2. Dexamethasone
3. Esomeprazole
4. Famotidine
5. Haloperidol
6. Hyoscine butylbromide
7. Levomepromazine
8. Metoclopramide
9. Octreotide
10. Olanzapine
11. Pantoprazole
12. Ranitidine
13. Other: please specify
14. If optimal symptom control was not achieved, which of the following medication(s) would you prescribe second (in addition) to best treat his nausea and vomiting? – Please select multiple options if applicable
15. Cyclizine
16. Dexamethasone
17. Esomeprazole
18. Famotidine
19. Haloperidol
20. Hyoscine butylbromide
21. Levomepromazine
22. Metoclopramide
23. Octreotide
24. Olanzapine
25. Pantoprazole
26. Ranitidine
27. Other: please specify
28. I would not prescribe additional pharmacotherapy
29. If optimal symptom control was not achieved, which of the following medication(s) would you prescribe third (in addition) to best treat his nausea and vomiting? – Please select multiple options if applicable
30. Cyclizine
31. Dexamethasone
32. Esomeprazole
33. Famotidine
34. Haloperidol
35. Hyoscine butyl bromide
36. Levomepromazine
37. Metoclopramide
38. Octreotide
39. Olanzapine
40. Pantoprazole
41. Ranitidine
42. Other: please specify
43. I would not prescribe additional pharmacotherapy
44. While working in ***your primary place of practice*** in palliative medicine for the previously described clinical vignette - would you recommend any of the following additional non-pharmacological measures for the management of nausea and vomiting? - Please select multiple options if applicable
45. Nasogastric tube insertion
46. Surgical referral for consideration of a venting gastrostomy
47. I would not recommend these options

Exploring Prescriber attitudes/opinions

1. Please rank the following factors in order of how they influenced your prescribing choices for the vignette – (1st being most important, 5th being least important)
2. Accessibility
3. Effectiveness
4. Tolerability/Side effect profile
5. Cost
6. Guidelines/Supporting Evidence in the literature
7. {Displayed concurrently with question 10} – Please provide any additional comments that would explain your prescribing choice
8. Please state if you agree or disagree with the following statement:

I can easily access my preferred pharmacotherapies for the treatment of nausea and vomiting for malignant bowel obstruction at my primary place of practice in palliative medicine

- 1. Strongly agree
  2. Agree
  3. Neutral
  4. Disagree
  5. Strongly disagree

1. Please state if you agree or disagree with the following statement

I follow a standard approach to prescribing pharmacotherapy for nausea and vomiting in malignant bowel obstruction:

1. Strongly agree
2. Agree
3. Neutral
4. Disagree
5. Strongly disagree
6. Please state if you agree or disagree with the following statement

At my primary place of practice there is a standard approach to prescribing pharmacotherapy for nausea and vomiting in malignant bowel obstruction:

1. Strongly agree
2. Agree
3. Neutral
4. Disagree
5. Strongly disagree
6. Please state if you agree or disagree for the following statement:

I believe there is a standard approach in Australia and New Zealand regarding prescribing pharmacotherapy for the management of nausea and vomiting in malignant bowel obstruction

- 1. Strongly agree
  2. Agree
  3. Neutral
  4. Disagree
  5. Strongly disagree
